# Supplementary material for: Autologous Fat Transfer for Facial Rejuvenation: A Systematic Review on Technique, Efficacy, and Satisfaction
Source: PubMed Central journal article supplement — Plast Reconstr Surg Glob Open. 2017 Dec 22;5(12):e1606. doi: 10.1097/GOX.0000000000001606 (PMC5889440; doi:10.1097/gox.0000000000001606), 2017-12-22
Supplement: gox-5-e1606-s001.pdf [file gox-5-e1606-s001.pdf]

## Search Strategy

### Search strategy for PubMed (11 December 2016)

[Mesh] = Medical subject headings

[tw] = textword: words in title, abstract, author keywords and MeSH

| Search | Query                                                                                                                                                                                                                                                                                                                                                                                                                                                                                                                                                                                                                                                                                                                                                                                                                                                                                                                                                                                                                                                                                                                                                                                                                                                                                                                                           |
|--------|-------------------------------------------------------------------------------------------------------------------------------------------------------------------------------------------------------------------------------------------------------------------------------------------------------------------------------------------------------------------------------------------------------------------------------------------------------------------------------------------------------------------------------------------------------------------------------------------------------------------------------------------------------------------------------------------------------------------------------------------------------------------------------------------------------------------------------------------------------------------------------------------------------------------------------------------------------------------------------------------------------------------------------------------------------------------------------------------------------------------------------------------------------------------------------------------------------------------------------------------------------------------------------------------------------------------------------------------------|
| #1     | ((("skin"[MeSH Terms] OR skin[tw] OR "face"[MeSH Terms] OR face[tw] OR facial[tw] OR "cheek"[MeSH Terms] OR cheek[tw] OR bucca[tw] OR buccas[tw] OR "chin"[MeSH Terms] OR chin[tw] OR mentum[tw] OR "nose"[MeSH Terms] OR nose[tw] OR external nose[tw] OR "nasolabial fold"[MeSH Terms] OR nasolabial fold[tw] OR nasojugal groove[tw] OR nasojugal[tw] OR "forehead"[MeSH Terms] OR forehead[tw] OR "mouth"[MeSH Terms] OR mouth[tw] OR temple[tw] OR orbital[tw] OR periorb*[tw] OR periorbital complex[tw] OR eyelid-cheek complex[tw] OR periocular[tw] OR peri-ocular[tw] OR oculofacial[tw]) AND ("aging"[MeSH Terms] OR aging[tw] OR ageing[tw] OR "skin aging"[MeSH Terms] OR "skin ageing"[tw] OR "skin aging"[tw] OR wrinkle[tw] OR wrinkle's[tw] OR wrinkleality[tw] OR wrinkled[tw] OR wrinkledness[tw] OR wrinklelike[tw] OR wrinkleness[tw] OR wrinkles[tw] OR wrinkliness[tw] OR wrinkling[tw] OR wrinklins[tw] OR wrinkly[tw] OR rhytid[tw] OR rhytids[tw] OR rhytide[tw] OR rhytides[tw] OR rhytidis[tw] OR "atrophy"[MeSH Terms] OR atroph*[tw] OR hollow[tw] OR hollow'[tw] OR hollow's[tw] OR hollowed[tw] OR hollower[tw] OR hollowing[tw] OR hollowing'[tw] OR hollowness[tw] OR hollownesses[tw] OR hollows[tw] OR volume loss[tw] OR sag[tw] OR sagged[tw] OR sagged'[tw] OR sagger[tw] OR sagers[tw] OR sagginess[tw] |

OR sagging[tw] OR skin redundancy[tw] OR skin excess[tw] OR excessi\*[tw]  
OR droopiness[tw] OR drooping[tw] OR droop[tw] OR ptosis[tw])) AND  
(("adipose tissue"[MeSH Terms] OR "subcutaneous fat"[MeSH Terms] OR  
"adipocytes"[MeSH Terms] OR adipose tissue\*[tw] OR fat[tw] OR fat  
pad\*[tw] OR fatty tissue\*[tw] OR body fat[tw] OR subcutaneous fat\*[tw] OR  
adipocyte\*[tw] OR lipo[tw] OR lipocyte[tw] OR lipocytes[tw] OR fat[tw] OR  
lipoaspirat\*[tw]) OR "rhytidoplasty"[MeSH Terms] OR rhytidoplast\*[tw] OR  
facelift\*[tw] OR face lift\*[tw] OR lipo-facelift\*[tw] OR rejuvenati\*[tw] OR  
recountour\*[tw] OR contouring[tw] OR contoured[tw] OR reshape[tw] OR  
reshaped[tw] OR reshaping[tw] OR reshapings[tw] OR sculpting[tw] (OR  
soft[tw] AND ("tissues"[MeSH Terms] OR tissues[tw] OR tissue[tw]) AND  
(augmentation[tw] OR soft tissue augmentation[tw]) OR augmentation[tw]) OR  
augmentation[tw] OR malarplasty[tw] OR "transplantation"[MeSH Terms] OR  
"transplantation"[subheading] OR transplantation[tw] OR "autografts"[Mesh]  
OR autotransplant\*[tw] OR autologous transplant\*[tw] OR "adipose  
tissue/transplantation"[MeSH Terms] OR ("adipose tissue"[Mesh Terms] AND  
"transplantation, autologous"[Mesh Terms]) OR  
"adipocytes/transplantation"[Mesh Terms] OR ("adipocytes"[Mesh Terms]  
AND "transplantation, autologous"[Mesh Terms]) OR lipograft\*[tw] OR lipo  
graft\*[tw] OR lipotransfer\*[tw] OR lipotransp\*[tw] OR autologous fat  
graft\*[tw] OR autogenous fat graft\*[tw] OR fat graft\*[tw] OR autologous fat  
transfer[tw] OR lipoinfiltr\*[tw] OR liposculpt\*[tw] OR (lipo[tw] AND  
sculpt\*[tw]) OR lipomodel\*[tw] OR lipofilled[tw] OR lipo-filled[tw] OR  
lipofilling[tw] OR lipo-filling[tw] OR fat filling[tw] OR lipofillings[tw] OR  
lipo-fillings[tw] OR lipofiller[tw] OR lipo-filler[tw] OR fat filler[tw] OR

lipoinfil\*[tw] OR lipo-infil\*[tw] OR lipoaugmen\*[tw] OR lipo-augmen\*[tw]  
OR fat-augmen\*[tw] OR lipoplasty[tw] OR lipoinject\*[tw] OR fat inject\*[tw]  
OR micro inject\*[tw] OR "tissue and organ harvesting"[MeSH Terms] OR  
harvest[tw] OR harvested[tw] OR harvesting[tw] OR "lipectomy"[MeSH  
Terms] OR lipectomy[tw]))

## Search strategy for Embase.com (11 December 2016)

/exp = EMtree keyword with explosion

/de = EMtree keyword without explosion

:ab,ti = words in title OR abstract

NEXT/x = words next to each other in that order, x places apart

| Search | Query                                                                                                                                                                                                                                                                                                                                                                                                                                                                                                                                                                                                                                                                                                                                                                                                                                                                                                                                                                                                                                                                                                                                                                                                                                                                                                                                                                        |
|--------|------------------------------------------------------------------------------------------------------------------------------------------------------------------------------------------------------------------------------------------------------------------------------------------------------------------------------------------------------------------------------------------------------------------------------------------------------------------------------------------------------------------------------------------------------------------------------------------------------------------------------------------------------------------------------------------------------------------------------------------------------------------------------------------------------------------------------------------------------------------------------------------------------------------------------------------------------------------------------------------------------------------------------------------------------------------------------------------------------------------------------------------------------------------------------------------------------------------------------------------------------------------------------------------------------------------------------------------------------------------------------|
| #1     | (exp 'skin'/ OR skin.ab,ti OR exp 'face'/ OR (face OR facial).ab,ti OR exp 'cheek'/ OR (cheek OR bucca OR buccas).ab,ti OR exp 'chin'/ OR (chin OR mentum).ab,ti OR exp 'nose'/ OR (nose OR external nose OR (external ADJ3 nose)).ab,ti OR exp 'nasolabial fold'/ OR (nasolabial fold OR (nasolab* ADJ3 fold)).ab,ti OR (nasojugal groove OR (nasojugal ADJ3 groove) OR nasojugal).ab,ti OR exp 'forehead'/ OR forehead.ab,ti OR exp 'mouth'/ OR mouth.ab,ti OR temple.ab,ti OR (orbital OR periorb* OR periorbital complex OR (periorbital ADJ3 complex) OR eyelid-cheek complex OR (eyelid-cheek ADJ3 complex) OR periocular OR peri-ocular OR oculofacial).ab,ti) AND (exp 'aging'/ OR (aging OR ageing).ab,ti OR exp 'skin aging'/ OR ('skin ageing' OR 'skin aging' OR (skin ADJ3 aging) OR (skin ADJ3 ageing)).ab,ti OR 'cutaneous parameters'/ OR 'cutaneous surface'/ OR 'cutaneous structure'/ OR (wrinkle OR wrinkleality OR wrinkled OR wrinkledness OR wrinklelike OR wrinkleness OR wrinkles OR wrinkliness OR wrinkling OR wrinklings OR wrinkly OR rhytid OR rhytids OR rhytide OR rhytides OR rhytidis).ab,ti OR exp 'atrophy'/ OR atroph*.ab,ti OR exp 'skin atrophy'/ OR (hollow OR hollowed OR hollower OR hollowing OR 'hollowing'/ OR hollowness OR hollownesses OR hollows OR 'volume loss' OR (volume ADJ3 loss)).ab,ti OR (sag OR sagged OR sagged' |

OR sagger OR sagers OR sagginess OR sagging).ab,ti OR (skin redundancy OR (skin ADJ3 redundan\*) OR skin excess OR (skin ADJ3 excess) OR excessi\*).ab,ti OR (droopiness OR drooping OR droop OR ptosis).ab,ti) AND (exp 'adipose tissue'/ OR exp 'subcutaneous fat'/ OR 'subcutaneous aspirate' OR exp 'abdominal fat aspiration biopsy'/ OR exp 'adipocyte'/ OR ((adipose ADJ3 tissue\*) OR fat OR (fat ADJ3 pad\*) OR 'fatty tissue' OR (fatty ADJ3 tissue) OR 'body fat' OR (body ADJ3 fat) OR 'subcutaneous fat' OR (subcutaneous ADJ3 fat\*) OR adipocyte\* OR lipo OR lipocyte OR lipocytes OR fat).ab,ti OR lipoaspirat\*.ab,ti OR exp 'rhytidoplasty'/ OR (rhytidoplast\* OR facelift\* OR face lift OR (face ADJ3 lift\*) OR lipo-facelift\*).ab,ti OR rejuvenati\*.ab,ti OR (recountour\* OR contouring OR contoured).ab,ti OR (reshape OR reshaped OR reshaping OR reshapings).ab,ti OR sculpting.ab,ti OR (('soft tissue' ADJ3 augmentation) OR 'soft tissue augmentation' OR augmentation).ab,ti OR (exp 'tissues'/ AND augmentation.ab,ti) OR augmentation.ab,ti OR malarplasty.ab,ti OR exp 'transplantation'/ OR transplantation.ab,ti OR exp 'transplants'/ OR exp 'autograft'/ OR (autotransplant\* OR autologous transplant OR (autologous ADJ3 transplant\*)).ab,ti OR 'adipose tissue'/su OR (exp 'adipose tissue'/ AND exp 'autotransplantation'/) OR (exp 'adipocyte'/ AND exp 'autotransplantation'/) OR (lipograft\* OR lipo graft\* OR (lipo ADJ3 graft\*) OR lipotransfer\* OR lipotransp\* OR autologous fat graft OR autologous fat grafts OR autologous fat grafting OR (autologous fat ADJ3 graft\*) OR autogenous fat graft OR autogenous fat grafts OR autogenous fat grafting OR (autogenous fat ADJ3 graft\*) OR fat graft\* OR autologous fat transfer OR lipoinfiltr\*).ab,ti OR liposculpt\*.ab,ti OR (lipo ADJ3 sculpt\*).ab,ti OR lipomodel\*.ab,ti OR (lipofilled OR lipo-filled OR lipofilling OR lipo-filling OR fat filling OR

|                                                                                                                                                                                                                                                                                                                                                                                            |
|--------------------------------------------------------------------------------------------------------------------------------------------------------------------------------------------------------------------------------------------------------------------------------------------------------------------------------------------------------------------------------------------|
| <p>lipofillings OR lipo-fillings OR lipofiller OR lipo-filler OR fat filler OR<br/>lipoinfil* OR lipo-infil* OR lipoaugmen* OR lipo-augmen* OR fat-<br/>augmen*).ab,ti OR lipoplasty.ab,ti OR (lipoinject* OR fat inject* OR micro<br/>inject*).ab,ti OR exp 'tissue and organ procurement'/ OR (harvest OR harvested<br/>OR harvesting).ab,ti OR exp 'lipectomy'/ OR lipectomy.ab,ti)</p> |
|--------------------------------------------------------------------------------------------------------------------------------------------------------------------------------------------------------------------------------------------------------------------------------------------------------------------------------------------------------------------------------------------|

## Search strategy for Wiley/Cochrane Library (11 December 2016)

ti,ab,kw = words in title, abstract or keyword

| Search | Query                                                                                                                                                                                                                                                                                                                                                                                                                                                                                                                                                                                                                                                                                                                                                                                                                                                                                                                                                                                                                                                                                                                                                                                                                                                                                                                                                                                                                                                                                                                                           |
|--------|-------------------------------------------------------------------------------------------------------------------------------------------------------------------------------------------------------------------------------------------------------------------------------------------------------------------------------------------------------------------------------------------------------------------------------------------------------------------------------------------------------------------------------------------------------------------------------------------------------------------------------------------------------------------------------------------------------------------------------------------------------------------------------------------------------------------------------------------------------------------------------------------------------------------------------------------------------------------------------------------------------------------------------------------------------------------------------------------------------------------------------------------------------------------------------------------------------------------------------------------------------------------------------------------------------------------------------------------------------------------------------------------------------------------------------------------------------------------------------------------------------------------------------------------------|
| #1     | <p>((('skin'[mh] OR skin:ab,ti OR 'face'[mh] OR (face OR facial):ab,ti OR 'cheek'[mh] OR (cheek OR bucca OR buccas):ab,ti OR 'chin'[mh] OR (chin OR mentum):ab,ti OR 'nose'[mh] OR (nose OR 'external nose' OR (external NEAR/3 nose)):ab,ti OR 'nasolabial fold'[mh] OR ('nasolabial fold' OR (nasolab* NEAR/3 fold)):ab,ti OR ('nasojugal groove' OR (nasojugal NEAR/3 groove) OR nasojugal):ab,ti OR 'forehead'[mh] OR forehead:ab,ti OR 'mouth'[mh] OR mouth:ab,ti OR temple:ab,ti OR (orbital OR periorb* OR 'periorbital complex' OR (periorbital NEAR/3 complex) OR 'eyelid-cheek complex' OR (eyelid-cheek NEAR/3 complex) OR periocular OR peri-ocular OR oculofacial):ab,ti) AND ('aging'[mh] OR (aging OR ageing):ab,ti OR 'skin aging'[mh] OR ('skin ageing' OR 'skin aging' OR (skin NEAR/3 aging) OR (skin NEAR/3 ageing)):ab,ti OR 'cutaneous parameters' OR 'cutaneous surface' OR 'cutaneous structure' OR (wrinkle OR wrinkleality OR wrinkled OR wrinkledness OR wrinklelike OR wrinkleness OR wrinkles OR wrinkliness OR wrinkling OR wrinklins OR wrinkly OR rhytid OR rhytids OR rhytide OR rhytides OR rhytidis):ab,ti OR 'atrophy'[mh] OR atroph*:ab,ti OR 'skin atrophy'[mh] OR (hollow OR hollowed OR hollower OR hollowing OR hollowness OR hollownesses OR hollows OR 'volume loss' OR (volume NEAR/3 loss)):ab,ti OR (sag OR sagged OR sagged' OR sagger OR sagger OR sagginess OR sagging):ab,ti OR ('skin redundancy' OR (skin NEAR/3 redundan*) OR 'skin excess' OR (skin NEAR/3 excess) OR excessi*):ab,ti</p> |

OR (droopiness OR drooping OR droop OR ptosis):ab,ti))) AND (('adipose tissue'[mh] OR 'subcutaneous fat'[mh] OR 'subcutaneous aspirate'[mh] OR 'adipocyte'[mh] OR ((adipose NEAR/3 tissue\*) OR fat OR (fat NEAR/3 pad\*) OR 'fatty tissue' OR (fatty NEAR/3 tissue) OR 'body fat' OR (body NEAR/3 fat) OR 'subcutaneous fat' OR (subcutaneous NEAR/3 fat\*) OR adipocyte\* OR lipo OR lipocyte OR lipocytes OR fat):ab,ti OR lipoaspirat\*:ab,ti OR 'rhytidoplasty'[mh] OR (rhytidoplast\* OR facelift\* OR 'face lift' OR (face NEAR/3 lift\*) OR lipo-facelift\*):ab,ti OR rejuvenati\*:ab,ti OR (recountour\* OR contouring OR contoured):ab,ti OR (reshape OR reshaped OR reshaping OR reshapings):ab,ti OR sculpting:ab,ti OR (('soft tissue' NEAR/3 augmentation) OR 'soft tissue augmentation' OR augmentation):ab,ti OR ('tissues'[mh] AND augmentation:ab,ti) OR augmentation:ab,ti OR malarplasty:ab,ti OR 'transplantation'[mh] OR transplantation:ab,ti OR 'transplants'[mh] OR 'autograft'[mh] OR (autotransplant\* OR 'autologous transplant' OR (autologous NEAR/3 transplant\*)):ab,ti OR ('adipose tissue'[mh] AND 'autotransplantation'[mh]) OR ('adipocyte'[mh] AND 'autotransplantation'[mh]) OR (lipograft\* OR lipo graft\* OR (lipo NEAR/3 graft\*) OR lipotransfer\* OR lipotransp\* OR 'autologous fat graft' OR 'autologous fat grafts' OR 'autologous fat grafting' OR ('autologous fat' NEAR/3 graft\*) OR 'autogenous fat graft' OR 'autogenous fat grafts' OR 'autogenous fat grafting' OR ('autogenous fat' NEAR/3 graft\*) OR fat graft\* OR 'autologous fat transfer' OR lipoinfiltr\*):ab,ti OR liposculpt\*:ab,ti OR (lipo NEAR/3 sculpt\*):ab,ti OR lipomodel\*:ab,ti OR (lipofilled OR lipo-filled OR lipofilling OR lipo-filling OR 'fat filling' OR lipofillings OR lipo-fillings OR lipofiller OR lipo-filler OR 'fat filler' OR lipoinfil\* OR lipo-infil\* OR



|  |                                                                                                                                                                                                                                                                   |
|--|-------------------------------------------------------------------------------------------------------------------------------------------------------------------------------------------------------------------------------------------------------------------|
|  | lipoaugmen* OR lipo-augmen* OR fat-augmen*):ab,ti OR lipoplasty:ab,ti<br>OR (lipoinject* OR fat inject* OR micro inject*):ab,ti OR 'tissue and organ<br>procurement'[mh] OR (harvest OR harvested OR harvesting):ab,ti OR<br>'lipectomy'[mh] OR lipectomy:ab,ti)) |
|--|-------------------------------------------------------------------------------------------------------------------------------------------------------------------------------------------------------------------------------------------------------------------|
