# Supplementary figures and images for: Autologous Fat Transfer for Facial Rejuvenation: A Systematic Review on Technique, Efficacy, and Satisfaction
Source: PubMed Central journal article supplement — Plast Reconstr Surg Glob Open. 2017 Dec 22;5(12):e1606. doi: 10.1097/GOX.0000000000001606 (PMC5889440; doi:10.1097/gox.0000000000001606), 2017-12-22

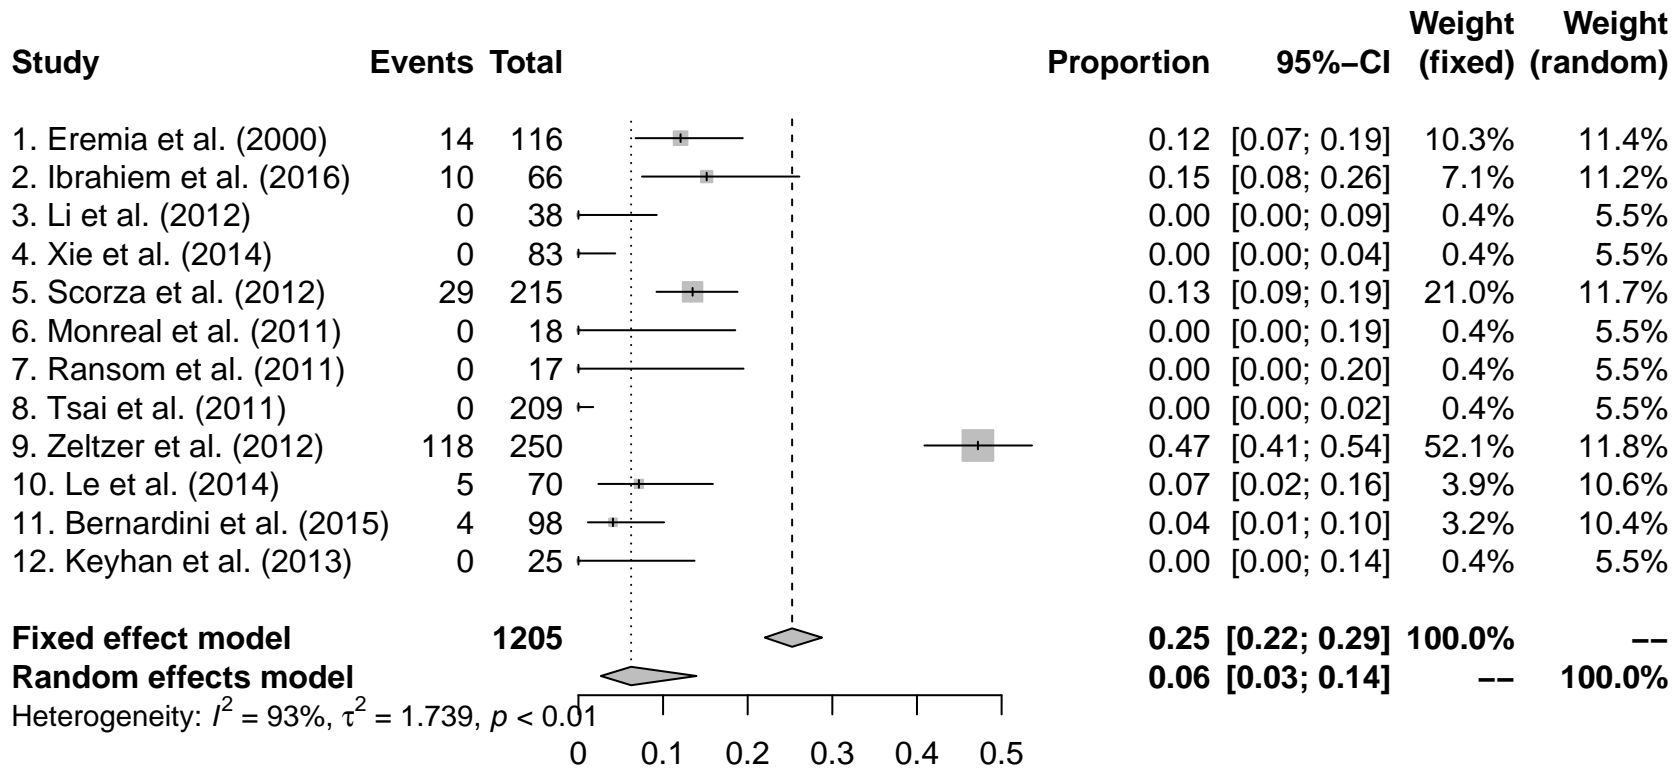

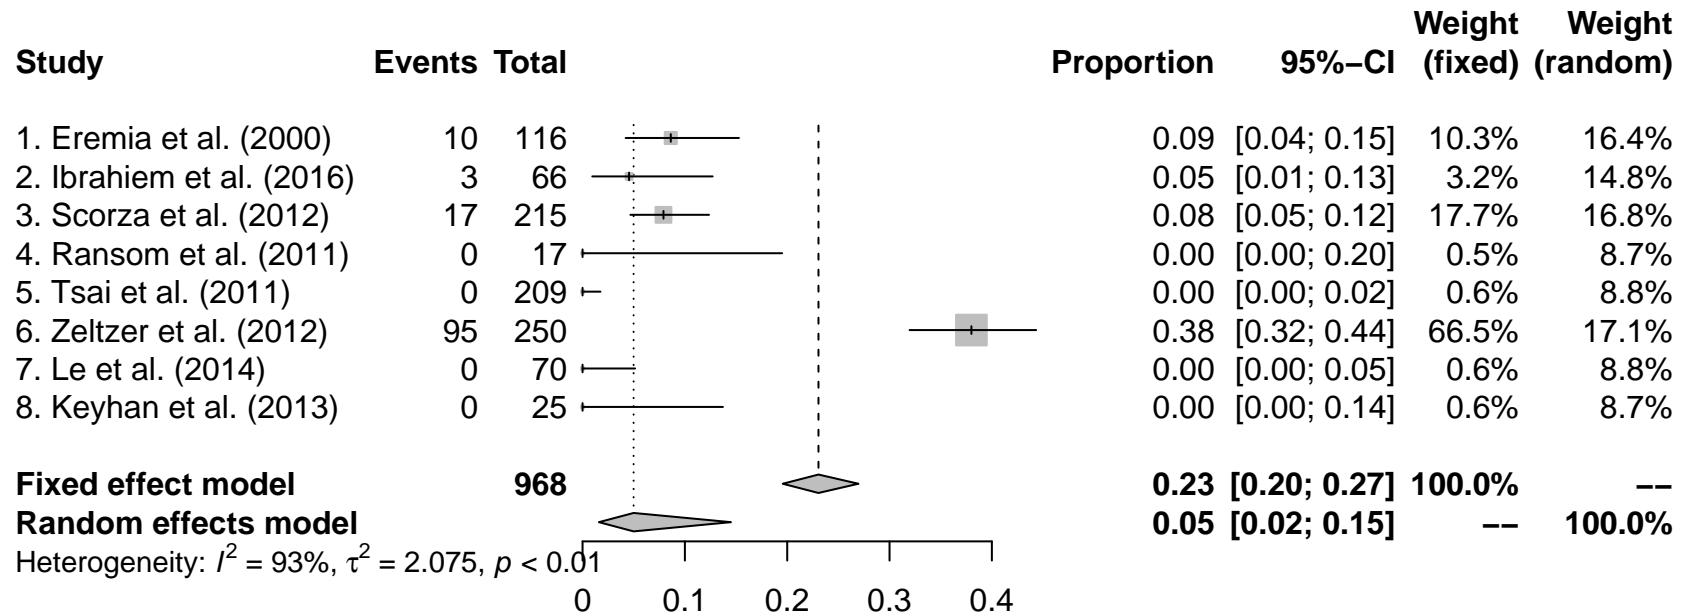

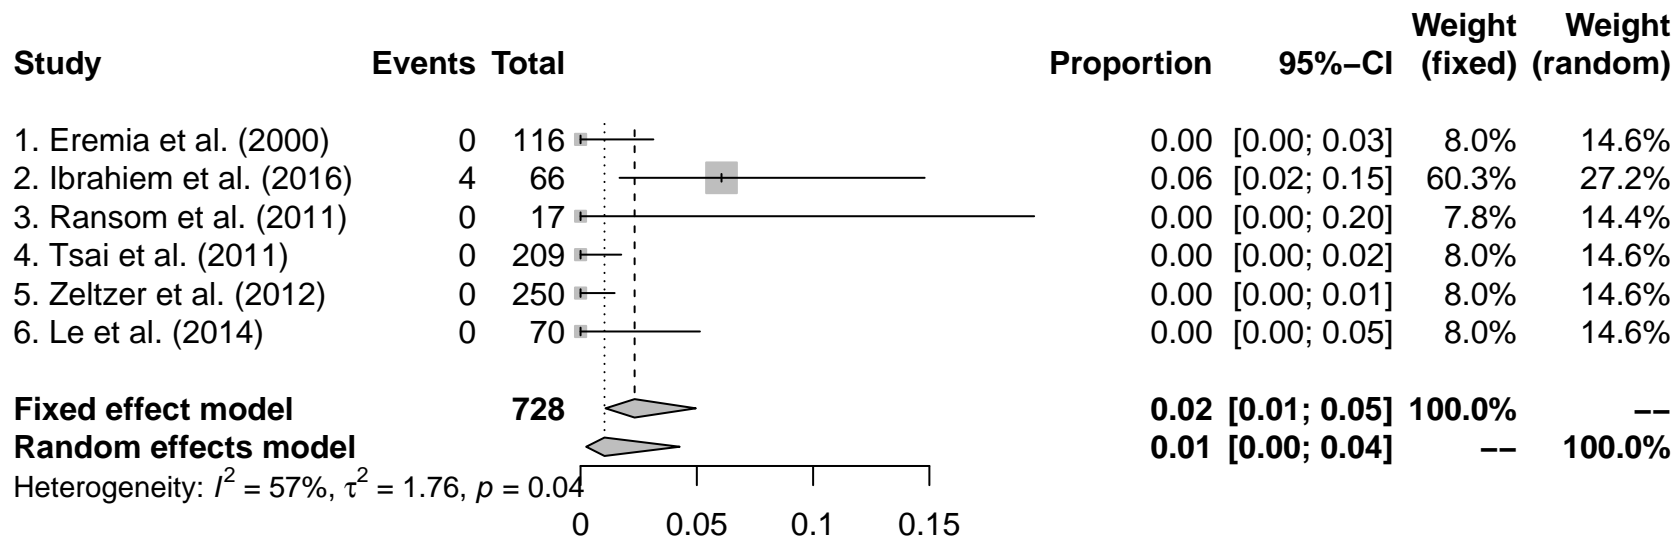

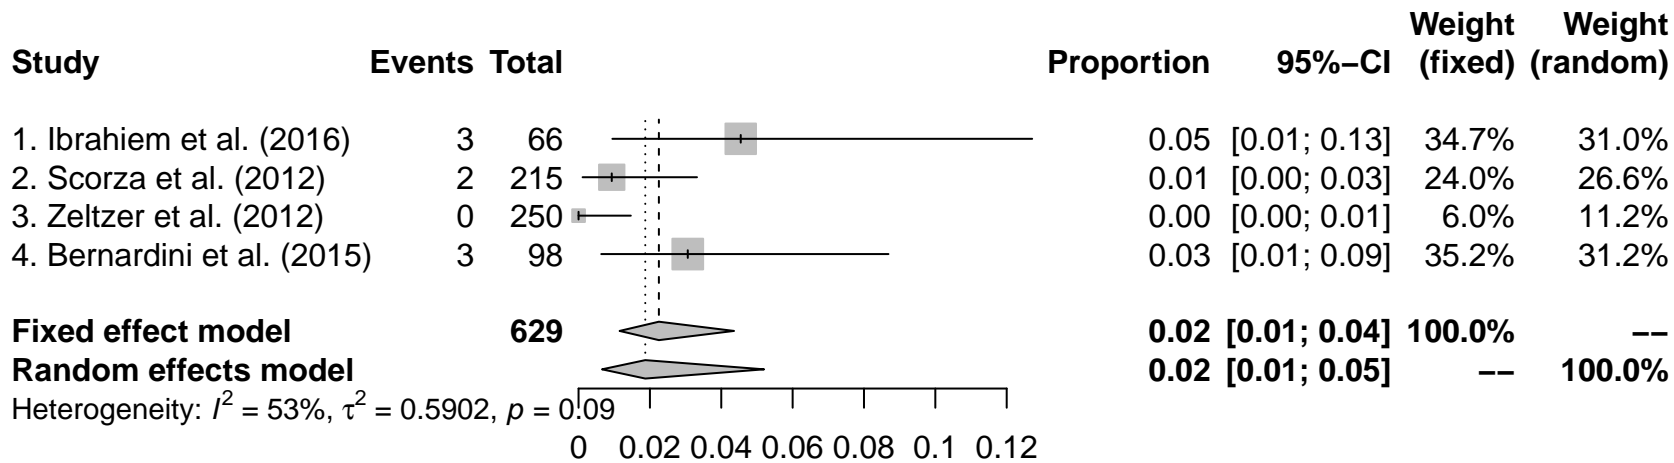

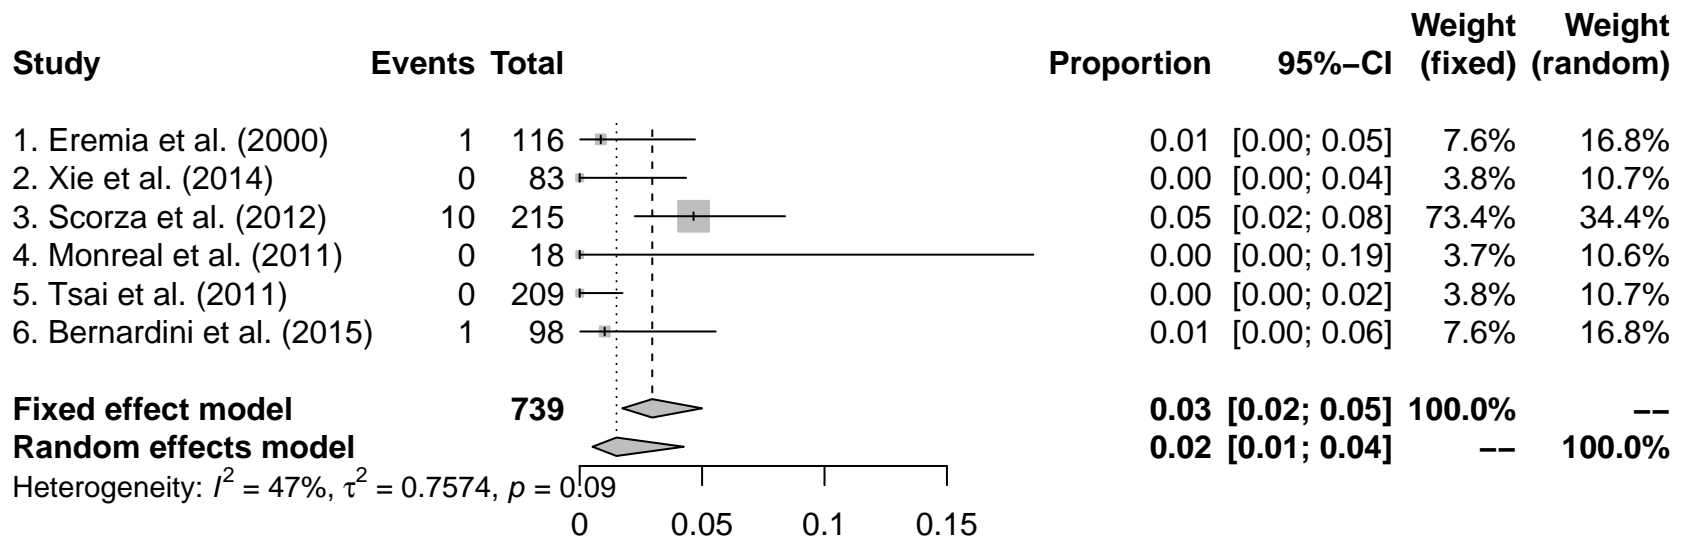

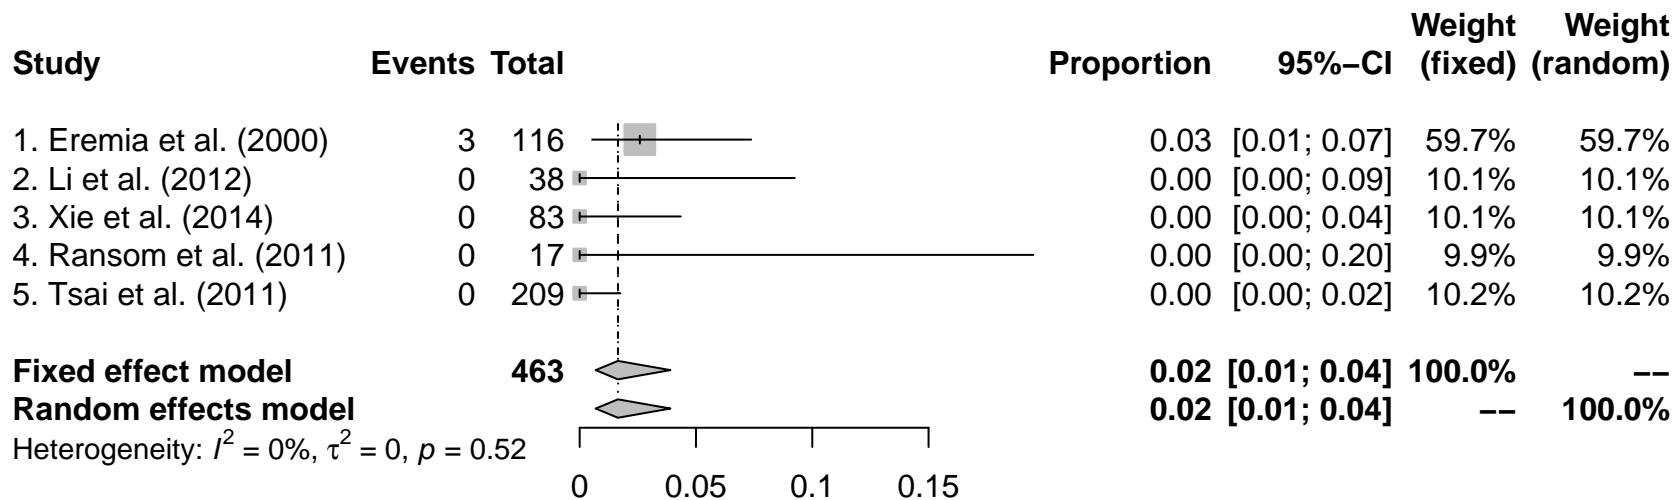

Supplement: gox-5-e1606-s002.pdf [file gox-5-e1606-s002.pdf]

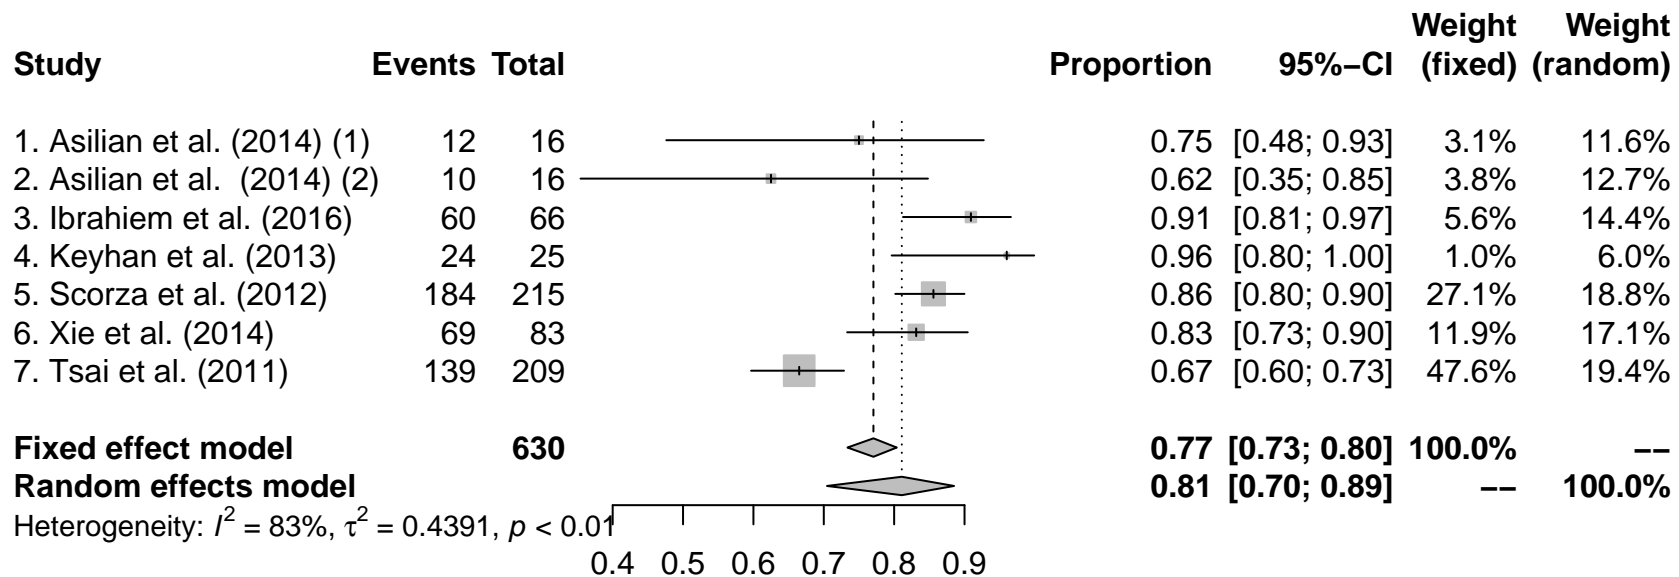

Supplement: gox-5-e1606-s003.pdf [file gox-5-e1606-s003.pdf]
